# Supplementary material for: Effect of Temperature and Altitude Difference on Tuberculosis Notification: A Systematic Review
Source: PubMed Central journal article supplement — J Glob Infect Dis. 2019 Apr-Jun;11(2):63–8. doi: 10.4103/jgid.jgid_95_18 (PMC6555232; doi:10.4103/jgid.jgid_95_18), 2019
Supplement: JGID-11-63_Suppl1.pdf [file JGID-11-63_Suppl1.pdf]

## SUPPLEMENT 1

Box 1: Search strategy on a systematic review of the impact of climatic and altitude variability and TB transmission

PubMed search ( $n = 956$ )

1. "Tuberculosis"
2. "Altitude"
3. "Temperature".

Search strings (all inclusive)

"(1) AND (2)" OR "(1) AND (3)" OR "(1) AND (4)" OR "(1) AND (5)" OR "(1) AND (6)"

EMBASE ( $n = 2866$ )

1. Tuberculosis, as major focus
2. "Altitude"
3. "Temperature".

Scopus ( $n = 1344$ )

1. "Tuberculosis"
2. "Altitude"
3. "Temperature".

Search strings (all inclusive)

1. 1 AND 2
2. 1 AND 3
3. 1 OR 2.
